# Supplementary material for: Occupational Exposure to Halogenated Anaesthetic Gases in Hospitals: A Systematic Review of Methods and Techniques to Assess Air Concentration Levels
Source: MDPI journal article supplement (doi:10.3390/ijerph20010514), 2022-12-28
Supplement: s1 [file s1]

# **Occupational exposure to halogenated anaesthetic gases in hospitals: a systematic review of methods and techniques to assess air concentration levels**

**Marta Keller <sup>1</sup>, Andrea Cattaneo<sup>1\*</sup>, Andrea Spinazzè<sup>1</sup>, Letizia Carrozzo<sup>1</sup>, Davide Campagnolo<sup>1</sup>, Sabrina Rovelli<sup>1</sup>, Francesca Borghi<sup>1</sup>, Giacomo Fanti<sup>1</sup>, Silvia Fustinoni<sup>2,3</sup>, Mariella Carrieri<sup>4</sup>, Angelo Moretto<sup>4</sup>, Domenico Maria Cavallo<sup>1</sup>**

<sup>1</sup> Department of Science and High Technology, University of Insubria, Como, Italy

<sup>2</sup> IRCCS Ca' Granda Foundation Maggiore Policlinico Hospital, Milan, Italy

<sup>3</sup> Department of Clinical Sciences and Community Health, University of Milan, Milan, Italy

<sup>4</sup> Department of Cardiac, Thoracic, Vascular Sciences and Public Health, University of Padua, Padua, Italy

\* Correspondence: [andrea.cattaneo@uninsubria.it](mailto:andrea.cattaneo@uninsubria.it)

## **SUPPLEMENTARY MATERIALS**

**Table S1** Summary of limit values for the halogenated anaesthetic gases isoflurane, desflurane and sevoflurane in the workplace recovered from (IFA, 2015).  
(1) mean value 15 minutes

[illegible]

**Table S2** Articles considered in this systematic review

| Reference                                             | Title                                                                                                                                                         |
|-------------------------------------------------------|---------------------------------------------------------------------------------------------------------------------------------------------------------------|
| (Ji et al., 2021)                                     | Effects of sevoflurane exposure on apoptosis and cell cycle of peripheral blood lymphocytes, and immunologic function                                         |
| (Hua et al., 2021)                                    | Effects of Occupational Exposure to Waste Anesthetic Gas on Oxidative Stress and DNA Damage                                                                   |
| (Dehghani et al., 2021)                               | Probabilistic health risk assessment of occupational exposure to isoflurane and sevoflurane in the operating room                                             |
| (Norton et al., 2020)                                 | Assessment of anesthetic gases in a central hospital                                                                                                          |
| (Neghab et al., 2020)                                 | Association between genotoxic properties of inhalation anesthetics and oxidative stress biomarkers                                                            |
| (Jafari et al., 2020)                                 | Effects of occupational exposure to trace levels of halogenated anesthetics on the liver, kidney, and oxidative stress parameters in operating room personnel |
| (Braz et al., 2020)                                   | High concentrations of waste anesthetic gases induce genetic damage and inflammation in physicians exposed for three years: A cross-sectional study           |
| (Herzog-Niescery et al., 2020)                        | Comparison of 3 Methods to Assess Occupational Sevoflurane Exposure in Abdominal Surgeons: A Single-Center Observational Pilot Study                          |
| (Herzog-Niescery, Vogelsang, Bellgardt, et al., 2019) | The Personnel's Sevoflurane Exposure in the Postanesthesia Care Unit Measured by Photoacoustic Gas Monitoring and Hexafluoroisopropanol Biomonitoring         |

|                                                  |                                                                                                                                                               |
|--------------------------------------------------|---------------------------------------------------------------------------------------------------------------------------------------------------------------|
| (Cheng et al., 2019)                             | Pilot studies of VOC exposure profiles during surgical operations                                                                                             |
| (Cakmak et al., 2019)                            | Genetic damage of operating and recovery room personnel occupationally exposed to waste anaesthetic gases                                                     |
| (Herzog-Niescery, Vogelsang, Gude, et al., 2019) | Environmental safety: Air pollution while using MIRUS™ for short-term sedation in the ICU                                                                     |
| (Williams et al., 2019)                          | Evaluation and control of waste anesthetic gas in the postanesthesia care unit within patient and caregiver breathing zones                                   |
| (Kampan, 2019)                                   | Air quality and employee hygiene-related behavior in a post anesthesia care unit in Thailand                                                                  |
| (Amiri et al., 2018)                             | Early, subclinical hematological changes associated with occupational exposure to high levels of nitrous oxide                                                |
| (Heiderich et al., 2018)                         | Low anaesthetic waste gas concentrations in postanesthesia care unit                                                                                          |
| (Jafari et al., 2018)                            | Environmental and biological measurements of isoflurane and sevoflurane in operating room personnel                                                           |
| (Herzog-Niescery et al., 2018)                   | The impact of the anesthetic conserving device on occupational exposure to isoflurane among intensive care healthcare professionals                           |
| (Jan-Peter Özelsel et al., 2018)                 | Elevated waste anaesthetic gas concentration in the paediatric postanesthesia care unit                                                                       |
| (Herzog-Niescery et al., 2017)                   | The child's behavior during inhalational induction and its impact on the anesthesiologist's sevoflurane exposure                                              |
| (Gobbo Braz et al., 2017)                        | Comparison of waste anesthetic gases in operating rooms with or without an scavenging system in a Brazilian University Hospital                               |
| (Souza et al., 2016)                             | Occupational exposure to anesthetics leads to genomic instability, cytotoxicity and proliferative changes                                                     |
| (Cheung et al., 2016)                            | Postoperative environmental anesthetic vapour concentrations following removal of the airway device in the operating room versus the postanesthesia care unit |

|                                   |                                                                                                                                                                                                         |
|-----------------------------------|---------------------------------------------------------------------------------------------------------------------------------------------------------------------------------------------------------|
| (Herzog-Niescery et al., 2016)    | Surgeons' exposure to sevoflurane during paediatric adenoidectomy: A comparison of three airway devices                                                                                                 |
| (Sárkány et al., 2016)            | Does standing or sitting position of the anesthesiologist in the operating theatre influence sevoflurane exposure during craniotomies?                                                                  |
| (Herzog-Niescery et al., 2015)    | Occupational chronic sevoflurane exposure in the everyday reality of the anesthesia workplace                                                                                                           |
| (Ghimenti et al., 2015)           | Determination of sevoflurane and isopropyl alcohol in exhaled breath by thermal desorption gas chromatography-mass spectrometry for exposure assessment of hospital staff                               |
| (Kunze et al., 2015)              | Multi-capillary column-ion mobility spectrometry (MCC-IMS) as a new method for the quantification of occupational exposure to sevoflurane in anaesthesia workplaces: An observational feasibility study |
| (Jankowska et al., 2015)          | Application of predictive models for estimation of health care workers exposure to sevoflurane                                                                                                          |
| (Hiller et al., 2015)             | Evaluation of Waste Anesthetic Gas in the Postanesthesia Care Unit within the Patient Breathing Zone                                                                                                    |
| (Chaoul et al., 2015)             | Does occupational exposure to anesthetic gases lead to increase of pro-inflammatory cytokines?                                                                                                          |
| (Scapellato et al., 2014)         | Biomonitoring occupational sevoflurane exposure at low levels by urinary sevoflurane and hexafluoroisopropanol                                                                                          |
| (González-Rodríguez et al., 2014) | Health worker exposure risk during inhalation sedation with sevoflurane using the (AnaConDa®) anaesthetic conserving device                                                                             |
| (Mcglathlin et al., 2014)         | Evaluation and control of waste anesthetic gases in the postanesthesia care unit                                                                                                                        |

|                                 |                                                                                                                                                       |
|---------------------------------|-------------------------------------------------------------------------------------------------------------------------------------------------------|
| (Gianella et al., 2014)         | Quantitative chemical analysis of surgical smoke generated during laparoscopic surgery with a vessel-sealing device                                   |
| (Zare Sakhvidi et al., 2013)    | Application of mathematical models in combination with monte carlo simulation for prediction of isoflurane concentration in an operation room theater |
| (Pickworth et al., 2013)        | The scavenging of volatile anesthetic agents in the cardiovascular intensive care unit environment: A technical report                                |
| (Zaffina et al., 2012)          | Occupational exposure to sevoflurane in pediatric operating rooms: The multi-point sampling method for risk assessment                                |
| (Blokker-Veldhuis et al., 2011) | Occupational exposure to sevoflurane during cardiopulmonary bypass                                                                                    |
| (Heijbel et al., 2010)          | Personnel breathing zone sevoflurane concentration adherence to occupational exposure limits in conjunction with filling of vaporisers                |
| (Schebesta et al., 2010)        | Exposure to anaesthetic trace gases during general anaesthesia: CobraPLA vs. LMA classic                                                              |
| (Rahe-Meyer et al., 2009)       | Comparison of breathing tube connectors during invasive bronchial procedures                                                                          |
| (Tankó et al., 2009)            | The relative exposure of the operating room staff to sevoflurane during intracerebral surgery                                                         |
| (Al-Ghanem et al., 2008)        | Monitoring of volatile anesthetics in operating room personnel using GC-MS                                                                            |
| (Ritzu et al., 2007)            | Anesthetic gases exposure: Findings from a 13 year environmental and biological monitoring in a hospital company                                      |
| (Barberio et al., 2006)         | Pollution of ambient air by volatile anesthetics: A comparison of 4 anesthetic management techniques                                                  |
| (Eroglu et al., 2006)           | A comparison of sister chromatid exchanges in lymphocytes of anesthesiologists to nonanesthesiologist in the same hospital                            |

|                         |                                                                                                                                     |
|-------------------------|-------------------------------------------------------------------------------------------------------------------------------------|
| (Accorsi et al., 2005)  | Urinary sevoflurane and hexafluoro-isopropanol as biomarkers of low-level occupational exposure to sevoflurane                      |
| (Sackey et al., 2005)   | Ambient isoflurane pollution and isoflurane consumption during intensive care unit sedation with the Anesthetic Conserving Device   |
| (Rovesti et al., 2005)  | Monitoring occupational exposure to volatile anaesthetics in the operating theatre: environmental and biological measurements       |
| (Ansalone et al., 2004) | Biological monitoring of occupational exposure to low sevoflurane concentrations: A new technique for measuring urinary sevoflurane |
| (Zanetti et al., 2004)  | Longitudinal study (16 years) of the reproductive health of 61 female workers exposed to known levels of volatile anaesthetics      |
| (Gentili et al., 2004)  | Exposure of personnel to sevoflurane during paediatric anaesthesia: Influence of professional role and anaesthetic procedure        |
| (Li et al., 2004)       | A local scavenging system to remove waste anesthetic gases during general anesthesia                                                |
| (Summer et al., 2003)   | Sevoflurane in exhaled air of operating room personnel                                                                              |
| (Raj et al., 2003)      | Evaluation of personal, environmental and biological exposure of paediatric anaesthetists to nitrous oxide and sevoflurane          |
| (Proietti et al., 2003) | Anaesthesia techniques, occupational exposure and early neurobehavioral effect                                                      |
| (Mierdl et al., 2003)   | Occupational exposure to inhalational anesthetics during cardiac surgery on cardiopulmonary bypass                                  |
| (Alessio et al., 2003)  | Biological monitoring of occupational exposure to Desflurane                                                                        |
| (Accorsi et al., 2003)  | Proposal for single and mixture biological exposure limits for sevoflurane and nitrous oxide at low occupational exposure levels    |

|                              |                                                                                                                                                                                             |
|------------------------------|---------------------------------------------------------------------------------------------------------------------------------------------------------------------------------------------|
| (Barbic et al., 2003)        | Urinary hexafluoroisopropanol in the evaluation of occupational exposure to sevoflurane: Methodological aspects and critical points                                                         |
| (Cope et al., 2002)          | Phase II collaborative pilot study: Preliminary analysis of central neural effects from exposure to volatile anesthetics in the PACU                                                        |
| (Li et al., 2002)            | Personnel exposure to waste sevoflurane and nitrous oxide during general anesthesia with cuffed endotracheal tube                                                                           |
| (Rieder et al., 2002)        | Monitoring pollution by proton-transfer-reaction mass spectrometry during paediatric anaesthesia with positive pressure ventilation via the laryngeal mask airway or uncuffed tracheal tube |
| (Tanser & Johnson, 2002)     | Evaluation of a new paediatric scavenging valve                                                                                                                                             |
| (Virgili et al., 2002)       | Occupational exposure to anesthetic gases at several hospitals                                                                                                                              |
| (Gustorff et al., 2002)      | Environmental monitoring of sevoflurane and nitrous oxide using the cuffed oropharyngeal airway                                                                                             |
| (Imbriani et al., 2001)      | Biological monitoring of occupational exposure to sevoflurane                                                                                                                               |
| (Rieder et al., 2001)        | Online monitoring of air quality at the postanesthetic care unit by proton-transfer-reaction mass spectrometry                                                                              |
| (Byhahn et al., 2001)        | Surgeon's occupational exposure to nitrous oxide and sevoflurane during pediatric surgery                                                                                                   |
| (Hoerauf et al., 2001)       | Waste gas exposure to sevoflurane and nitrous oxide during anaesthesia using the oesophageal-tracheal Combitube small adult                                                                 |
| (Wiesner et al., 2001)       | A follow-up study on occupational exposure to inhaled anaesthetics in Eastern European surgeons and circulating nurses                                                                      |
| (Henderson & Matthews, 2000) | Staff exposure to anaesthetic gases in theatre and non theatre areas                                                                                                                        |
| (Haufroid et al., 2000)      | Biological monitoring of exposure to sevoflurane in operating room personnel by the measurement of hexafluoroisopropanol and fluoride in urine                                              |
| (Sitarek et al., 2000)       | Concentrations of anaesthetic gases in hospital operating theatres                                                                                                                          |



|                                   |                                                                                                                                                                       |
|-----------------------------------|-----------------------------------------------------------------------------------------------------------------------------------------------------------------------|
| (Byhahn et al., 2000)             | Occupational exposure to nitrous oxide and desflurane during ear-nose-throat-surgery                                                                                  |
| (Proietti et al., 2000)           | Environmental monitoring and health monitoring for personnel exposed to inhalation anesthetics                                                                        |
| (Wiesner et al., 2000)            | Occupational exposure to inhaled anaesthetics: A follow-up study on anaesthetists of eastern European university hospital                                             |
| (Henderson & Matthews, 1999)      | An environmental survey of compliance with occupational exposure standards (OES) for anaesthetic gases                                                                |
| (Hoerauf, Hartmann, et al., 1999) | Occupational exposure to sevoflurane during sedation of adult patients                                                                                                |
| (Hoerauf, Wallner, et al., 1999)  | Exposure to sevoflurane and nitrous oxide during four different methods of anesthetic induction                                                                       |
| (Sessler & Badgwell, 1998)        | Exposure of postoperative nurses to exhaled anesthetic gases                                                                                                          |
| (Hobbhahn et al., 1998)           | Waste gas exposure during desflurane and isoflurane anaesthesia                                                                                                       |
| (Imbriani et al., 1998)           | The biological monitoring of inhalation anaesthetics.                                                                                                                 |
| (Lucchini et al., 1995)           | Neurobehavioral functions in operating theatre personnel: a multicenter study                                                                                         |
| (Prado et al., 1997)              | Biological monitoring of occupational exposure to isoflurane by measurement of isoflurane exhaled breath                                                              |
| (Hoerauf, Harth, et al., 1997)    | Occupational exposure to sevoflurane, halothane and nitrous oxide during paediatric anaesthesia. Waste gas exposure during paediatric anaesthesia                     |
| (Hoerauf, Funk, et al., 1997)     | Occupational exposure to desflurane and isoflurane during cardiopulmonary bypass: Is the gas outlet of the membrane oxygenator an operating theatre pollution hazard? |
| (Hall et al., 1997)               | Environmental monitoring during gaseous induction with sevoflurane                                                                                                    |

|                                         |                                                                                                                                                                 |
|-----------------------------------------|-----------------------------------------------------------------------------------------------------------------------------------------------------------------|
| (Hoerauf, Koller, Taeger, et al., 1996) | Occupational exposure to sevoflurane and nitrous oxide in operating room personnel                                                                              |
| (Hoerauf, Koller, Jakob, et al., 1996)  | Isoflurane waste gas exposure during general anaesthesia: The laryngeal mask compared with tracheal intubation                                                  |
| (De-Amici et al., 1996)                 | Qualitative characteristics of human exposure to air chemical pollutants in operating rooms                                                                     |
| (Domenegati et al., 1996)               | Evaluation of a protocol of health surveillance for the personnel exposed to inhalation anesthetics in a sample of 3 operating rooms                            |
| (Imberti et al., 1995)                  | Low flow anaesthesia reduces occupational exposure to inhalation anaesthetics Environmental and biological measurements in operating room personnel             |
| (Imbriani et al., 1995)                 | Anesthetic in urine as biological index of exposure in operating-room personnel                                                                                 |
| (Coleman et al., 1994)                  | Prevention of atmospheric contamination during isoflurane sedation                                                                                              |
| (Buratti et al., 1993)                  | The biological monitoring of occupational exposure to anesthetic gas and vapors: the determination of nitrogen protoxide, halothane and isoflurane in the urine |
| (Marracini et al., 1992)                | Evaluation of several neuropsychological parameters in subjects occupationally exposed to anesthetics                                                           |
| (Dang et al., 1992)                     | Theatre staff members and exposure to halogenated agents                                                                                                        |
| (Imbriani & Ghittori, 1988)             | Evaluation of exposure to isoflurane (Forane): Environmental and biological measurements in operating room personnel                                            |
| (Ravagli et al., 1987)                  | Anesthetics vapors and gases and health hazards: results of an environmental survey                                                                             |

---

**Table S3** Anaesthetic gases considered in the studies under review. Mixed collects articles with more than one anaesthetic gas.

| Anaesthetic gas | Number of papers |                                  | Reference                                                                                                                                                                                                                                                                                                                                                                                                                                                                                                                                                                                                                                                                                                                                                                                                                                                                                                                                                                                                                                                                                                                                |
|-----------------|------------------|----------------------------------|------------------------------------------------------------------------------------------------------------------------------------------------------------------------------------------------------------------------------------------------------------------------------------------------------------------------------------------------------------------------------------------------------------------------------------------------------------------------------------------------------------------------------------------------------------------------------------------------------------------------------------------------------------------------------------------------------------------------------------------------------------------------------------------------------------------------------------------------------------------------------------------------------------------------------------------------------------------------------------------------------------------------------------------------------------------------------------------------------------------------------------------|
| Sevoflurane     | 49               | 90s= 5<br>2000s= 20<br>2010s= 24 | (Accorsi et al., 2003, 2005; Ansalone et al., 2004; Barbic et al., 2003; Blokker-Veldhuis et al., 2011; Byhahn et al., 2001; Cakmak et al., 2019; Cheng et al., 2019; Eroglu et al., 2006; Gentili et al., 2004; Ghimenti et al., 2015; Gianella et al., 2014; González-Rodríguez et al., 2014; Gustorff et al., 2002; Hall et al., 1997; Haufroid et al., 2000; Heiderich et al., 2018; Heijbel et al., 2010; Henderson & Matthews, 2000; Herzog-Niescery et al., 2015, 2016, 2017, 2020; Herzog-Niescery, Vogelsang, Bellgardt, et al., 2019; Hiller et al., 2015; Hoerauf et al., 2001; Hoerauf, Harth, et al., 1997; Hoerauf, Hartmann, et al., 1999; Hoerauf, Koller, Taeger, et al., 1996; Hoerauf, Wallner, et al., 1999; Hua et al., 2021; Imbriani et al., 2001; Jankowska et al., 2015; Ji et al., 2021; Kunze et al., 2015; Li et al., 2002, 2004; Mcglathlin et al., 2014; Özelsel et al., 2018; Rahe-Meyer et al., 2009; Raj et al., 2003; Rieder et al., 2002; Sárkány et al., 2016; Scapellato et al., 2014; Schebesta et al., 2010; Summer et al., 2003; Tankó et al., 2009; Zaffina et al., 2012; Zanetti et al., 2004) |
| Isoflurane      | 26               | 90s= 15<br>2000s= 9<br>2010s= 2  | (Buratti et al., 1993; Coleman et al., 1994; Cope et al., 2002; Dang et al., 1992; De-Amici et al., 1996; Domenegati et al., 1996; Henderson & Matthews, 1999; Herzog-Niescery et al., 2018; Hoerauf, Koller, Jakob, et al., 1996; Imberti et al., 1995; Imbriani et al., 1995, 1998; Imbriani & Ghittori, 1988; Lucchini et al., 1995; Marracini et al., 1992; Prado et al., 1997; Proietti et al., 2000, 2003; Ravagli et al., 1987; Rovesti et al., 2005; Sackey et al., 2005; Sitarek et al., 2000; Tanser & Johnson, 2002; Wiesner et al., 2000, 2001; Zare Sakhvidi et al., 2013)                                                                                                                                                                                                                                                                                                                                                                                                                                                                                                                                                  |
| Desflurane      | 2                | 2000s= 1<br>2010s= 1             | (Kampan 2019; Byhahn et al. 2000)                                                                                                                                                                                                                                                                                                                                                                                                                                                                                                                                                                                                                                                                                                                                                                                                                                                                                                                                                                                                                                                                                                        |
| Mixed           | 24               | 90s= 3<br>2000s= 7<br>2010s= 14  | (Al-Ghanem et al., 2008; Alessio et al., 2003; Amiri et al., 2018; Barberio et al., 2006; Braz et al., 2020; Chaoul et al., 2015; Cheung et al., 2016; Dehghani et al., 2021; Gobbo Braz et al., 2017; Herzog-Niescery, Vogelsang, Gude, et al., 2019; Hobbhahn et al., 1998; Hoerauf, Harth, et al., 1997; Jafari et al., 2018, 2020; Mierdl et al., 2003; Neghab et al., 2020; Norton et al., 2020; Pickworth et al., 2013; Rieder et al., 2001; Ritzu et al., 2007; Sessler & Badgwell, 1998; Souza et al., 2016; Virgili et al., 2002; Williams et al., 2019)                                                                                                                                                                                                                                                                                                                                                                                                                                                                                                                                                                        |

**Table S4** Hospital environments present in the studies under review. Mixed collects articles with more than one environment.

| Hospital environments     | Number of papers | Reference                                                                                                                                                                                                                                                                                                                                                                                                                                                                                                                                                                                                                                                                                                                                                                                                                                                                                                                                                                                                                                                                                                                                                                                                                                                                                                                                                                                                                                                                                                                                                                                                                         |
|---------------------------|------------------|-----------------------------------------------------------------------------------------------------------------------------------------------------------------------------------------------------------------------------------------------------------------------------------------------------------------------------------------------------------------------------------------------------------------------------------------------------------------------------------------------------------------------------------------------------------------------------------------------------------------------------------------------------------------------------------------------------------------------------------------------------------------------------------------------------------------------------------------------------------------------------------------------------------------------------------------------------------------------------------------------------------------------------------------------------------------------------------------------------------------------------------------------------------------------------------------------------------------------------------------------------------------------------------------------------------------------------------------------------------------------------------------------------------------------------------------------------------------------------------------------------------------------------------------------------------------------------------------------------------------------------------|
| Operating rooms           | 77               | (Accorsi et al., 2003, 2005; Al-Ghanem et al., 2008; Alessio et al., 2003; Amiri et al., 2018; Ansalone et al., 2004; Barberio et al., 2006; Barbic et al., 2003; Blokker-Veldhuis et al., 2011; Braz et al., 2020; Buratti et al., 1993; Byhahn et al., 2000, 2001; Chaoul et al., 2015; Cheng et al., 2019; Dang et al., 1992; De-Amici et al., 1996; Dehghani et al., 2021; Domenegati et al., 1996; Eroglu et al., 2006; Gentili et al., 2004; Ghimenti et al., 2015; Gianella et al., 2014; Gobbo Braz et al., 2017; Gustorff et al., 2002; Haufroid et al., 2000; Heijbel et al., 2010; Herzog-Niescery et al., 2015, 2016, 2017, 2020; Hobbhahn et al., 1998; Hoerauf et al., 2001; Hoerauf, Funk, et al., 1997; Hoerauf, Harth, et al., 1997; Hoerauf, Koller, Jakob, et al., 1996; Hoerauf, Koller, Taeger, et al., 1996; Hoerauf, Wallner, et al., 1999; Hua et al., 2021; Imberti et al., 1995; Imbriani et al., 1995, 1998, 2001; Imbriani & Ghittori, 1988; Jafari et al., 2018, 2020; Jankowska et al., 2015; Ji et al., 2021; Li et al., 2002, 2004; Lucchini et al., 1997; Marracini et al., 1992; Mierdl et al., 2003; Neghab et al., 2020; Prado et al., 1997; Proietti et al., 2000, 2003; Rahe-Meyer et al., 2009; Raj et al., 2003; Ravagli et al., 1987; Rieder et al., 2002; Ritzu et al., 2007; Rovesti et al., 2005; Sárkány et al., 2016; Scapellato et al., 2014; Schebesta et al., 2010; Sitarek et al., 2000; Souza et al., 2016; Summer et al., 2003; Tankó et al., 2009; Virgili et al., 2002; Wiesner et al., 2000, 2001; Zaffina et al., 2012; Zanetti et al., 2004; Zare Sakhvidi et al., 2013) |
| Postanesthesia care units | 15               | (Cope et al., 2002; González-Rodríguez et al., 2014; Heiderich et al., 2018; Henderson & Matthews, 1999; Herzog-Niescery, Vogelsang, Bellgardt, et al., 2019; Hiller et al., 2015; Kampan, 2019; Kunze et al., 2015; Mcglothlin et al., 2014; Norton et al., 2020; Özelsel et al., 2018; Rieder et al., 2001; Sackey et al., 2005; Sessler & Badgwell, 1998; Williams et al., 2019)                                                                                                                                                                                                                                                                                                                                                                                                                                                                                                                                                                                                                                                                                                                                                                                                                                                                                                                                                                                                                                                                                                                                                                                                                                               |
| Intensive care units      | 4                | (Coleman et al., 1994; Herzog-Niescery et al., 2018; Herzog-Niescery, Vogelsang, Gude, et al., 2019; Pickworth et al., 2013)                                                                                                                                                                                                                                                                                                                                                                                                                                                                                                                                                                                                                                                                                                                                                                                                                                                                                                                                                                                                                                                                                                                                                                                                                                                                                                                                                                                                                                                                                                      |
| Anaesthesia rooms         | 2                | (Tanser and Johnson 2002; Hall et al. 1997)                                                                                                                                                                                                                                                                                                                                                                                                                                                                                                                                                                                                                                                                                                                                                                                                                                                                                                                                                                                                                                                                                                                                                                                                                                                                                                                                                                                                                                                                                                                                                                                       |
| Mixed                     | 3                | (Cakmak et al., 2019; Cheung et al., 2016; Henderson & Matthews, 2000)                                                                                                                                                                                                                                                                                                                                                                                                                                                                                                                                                                                                                                                                                                                                                                                                                                                                                                                                                                                                                                                                                                                                                                                                                                                                                                                                                                                                                                                                                                                                                            |

**Table S5** Techniques considered in the studies under review. Mixed collects articles with real-time and time-integrated techniques.

| Technique       | Number of papers | Reference                                                                                                                                                                                                                                                                                                                                                                                                                                                                                                                                                                                                                                                                                                                                                                                                                                                                                                                                                                                                                                                                                                                                                                                                                                                                                           |
|-----------------|------------------|-----------------------------------------------------------------------------------------------------------------------------------------------------------------------------------------------------------------------------------------------------------------------------------------------------------------------------------------------------------------------------------------------------------------------------------------------------------------------------------------------------------------------------------------------------------------------------------------------------------------------------------------------------------------------------------------------------------------------------------------------------------------------------------------------------------------------------------------------------------------------------------------------------------------------------------------------------------------------------------------------------------------------------------------------------------------------------------------------------------------------------------------------------------------------------------------------------------------------------------------------------------------------------------------------------|
| Real-time       | 57               | (Ansalone et al., 2004; Barberio et al., 2006; Blokker-Veldhuis et al., 2011; Braz et al., 2020; Buratti et al., 1993; Byhahn et al., 2000, 2001; Chaoul et al., 2015; Cheung et al., 2016; Coleman et al., 1994; Domenegati et al., 1996; Eroglu et al., 2006; Gianella et al., 2014; Gobbo Braz et al., 2017; Gustorff et al., 2002; Hall et al., 1997; Heiderich et al., 2018; Heijbel et al., 2010; Henderson & Matthews, 2000; Herzog-Niescery et al., 2015, 2016, 2017, 2018, 2020; Herzog-Niescery, Vogelsang, Bellgardt, et al., 2019; Hiller et al., 2015; Hobbhahn et al., 1998; Hoerauf, Funk, et al., 1997; Hoerauf, Harth, et al., 1997; Hoerauf, Hartmann, et al., 1999; Hoerauf, Koller, Jakob, et al., 1996; Hoerauf, Koller, Taeger, et al., 1996; Hoerauf, Wallner, et al., 1999; Kampan, 2019; Kunze et al., 2015; Li et al., 2002, 2004; Lucchini et al., 1997; Mcglathlin et al., 2014; Mierdl et al., 2003; Norton et al., 2020; Özelsel et al., 2018; Pickworth et al., 2013; Proietti et al., 2000, 2003; Rahe-Meyer et al., 2009; Rieder et al., 2001, 2002; Rovesti et al., 2005; Schebesta et al., 2010; Sitarek et al., 2000; Souza et al., 2016; Summer et al., 2003; Tanser & Johnson, 2002; Wiesner et al., 2000, 2001; Williams et al., 2019; Zaffina et al., 2012) |
| Time-integrated | 41               | (Accorsi et al., 2005; Al-Ghanem et al., 2008; Alessio et al., 2003; Amiri et al., 2018; Barbic et al., 2003; Cakmak et al., 2019; Cheng et al., 2019; Coleman et al., 1994; Cope et al., 2002; Dang et al., 1992; De-Amici et al., 1996; Dehghani et al., 2021; Gentili et al., 2004; Ghimenti et al., 2015; González-Rodríguez et al., 2014; Haufroid et al., 2000; Hua et al., 2021; Imberti et al., 1995; Imbriani et al., 1995, 1998, 2001; Imbriani & Ghittori, 1988; Jafari et al., 2018, 2020; Jankowska et al., 2015; Ji et al., 2021; Kampan, 2019; Marracini et al., 1992; Neghab et al., 2020; Prado et al., 1997; Raj et al., 2003; Ravagli et al., 1987; Rieder et al., 2001; Sackey et al., 2005; Sárkány et al., 2016; Scapellato et al., 2014; Sessler & Badgwell, 1998; Sitarek et al., 2000; Summer et al., 2003; Tankó et al., 2009; Zare Sakhvidi et al., 2013)                                                                                                                                                                                                                                                                                                                                                                                                                |
| Mixed           | 3                | (Henderson & Matthews, 1999; Ritzu et al., 2007; Virgili et al., 2002)                                                                                                                                                                                                                                                                                                                                                                                                                                                                                                                                                                                                                                                                                                                                                                                                                                                                                                                                                                                                                                                                                                                                                                                                                              |

**Table S6** Real-time samplers for anaesthetic gases present in the articles in question

<sup>1</sup>PAS= *photoacoustic spectroscopy*; IR= *infrared spectrophotometry*; FT-IR= *Fourier transform infrared spectroscopy* IMS= *ion mobility spectrometer*; PTR-MS= *proton-transfer-reaction mass spectrometry*.  
n.a. = *not available*

| Analytic System  | Dimension (cm)<br>Weight (Kg) | Detection range<br>Resolution | Sampling frequency (s) | Interferences                   | References                                                                                                                                                                                                                                                                                                                                                                                                                                                                                                                                                                                                                                                                                                                                             |
|------------------|-------------------------------|-------------------------------|------------------------|---------------------------------|--------------------------------------------------------------------------------------------------------------------------------------------------------------------------------------------------------------------------------------------------------------------------------------------------------------------------------------------------------------------------------------------------------------------------------------------------------------------------------------------------------------------------------------------------------------------------------------------------------------------------------------------------------------------------------------------------------------------------------------------------------|
| PAS <sup>1</sup> | 17.5 x 39.5 x 30.0<br>9       | 0.01<br>ppm                   | 60                     | N <sub>2</sub> O and alcohol    | (Ansalone et al., 2004; Blokker-Veldhuis et al., 2011; Byhahn et al., 2000, 2001; Domenegati et al., 1996; Gustorff et al., 2002; Herzog-Niescery et al., 2020; Herzog-Niescery, Vogelsang, Bellgardt, et al., 2019; Herzog-Niescery, Vogelsang, Gude, et al., 2019; Herzog-Niescery et al., 2015, 2016, 2017, 2018; Hobbhahn et al., 1998; Hoerauf, Funk, et al., 1997; Hoerauf, Harth, et al., 1997; Hoerauf, Hartmann, et al., 1999; Hoerauf, Koller, Jakob, et al., 1996; Hoerauf, Koller, Taeger, et al., 1996; Hoerauf, Wallner, et al., 1999; Lucchini et al., 1997; Mierdl et al., 2003; Proietti et al., 2000, 2003; Rahe-Meyer et al., 2009; Rovesti et al., 2005; Schebesta et al., 2010; Wiesner et al., 2000, 2001; Zaffina et al., 2012) |
| IR <sup>1</sup>  | 38.1 x 36.5 x 19.1<br>8.2     | 0.01-0.2<br>ppm               | 20                     | CO <sub>2</sub> and water vapor | (Norton et al. 2020; Braz et al. 2020; Williams et al. 2019; Özelsel et al. 2018; Gobbo Braz et al. 2017; Souza et al. 2016; Cheung et al. 2016; Chaoul et al. 2015; Hiller et al. 2015; Mcglothlin, Moenning, and Cole 2014; Pickworth et al. 2013; Heijbel, BjurstÖm, and Jakobsson 2010; Joy Barberio et al. 2006; Li et al. 2002; Tanser and Johnson 2002; K. H. Hoerauf et al. 2001; Henderson and Matthews 2000; Hall et al. 1997; Coleman et al. 1994; Buratti et al. 1993)                                                                                                                                                                                                                                                                     |

|                     |                           |             |                 |                                                                      |                                                               |
|---------------------|---------------------------|-------------|-----------------|----------------------------------------------------------------------|---------------------------------------------------------------|
| FT-IR <sup>1</sup>  | 45 x 30 x 21<br><i>13</i> | n.a.        | 100 spectra/sec | CO <sub>2</sub> and water vapor                                      | (Eroglu et al., 2006; Gianella et al., 2014; Li et al., 2002) |
| IMS <sup>1</sup>    | n.a.<br><i>15</i>         | <i>ppt</i>  | n.a.            | n.a.                                                                 | (Heiderich et al., 2018; Kunze et al., 2015)                  |
| PTR-MS <sup>1</sup> | n.a.                      | <i>pptw</i> | 0.1             | molecular species other than<br>the specific molecule in<br>question | (Rieder et al., 2001, 2002; Summer et al., 2003)              |

## REFERENCES

- Accorsi, A., Morrone, B., Domenichini, I., Valenti, S., Raffi, G. B., & Violante, F. S. (2005). *Urinary sevoflurane and hexafluoro-isopropanol as biomarkers of low-level occupational exposure to sevoflurane*. <https://doi.org/10.1007/s00420-004-0580-8>
- Accorsi, A., Valenti, S., Barbieri, A., Raffi, G. B., & Violante, F. S. (2003). Proposal for single and mixture biological exposure limits for sevoflurane and nitrous oxide at low occupational exposure levels. *International Archives of Occupational and Environmental Health*, 76(2), 129–136. <https://doi.org/10.1007/s00420-002-0379-4>
- Al-Ghanem, S., Battah, A. H., & Salhab, A. S. (2008). Monitoring of volatile anesthetics in operating room personnel using GC-MS. *Jordan Medical Journal*, 42(1), 13–19.
- Alessio, A., Zadra, P., Negri, S., Maestri, L., Imberti, R., Ghittori, S., Imbriani, M., & Cavalleri, A. (2003). *Monitoraggio biologico dell'esposizione occupazionale a Desflurane* (pp. 137–141).
- Amiri, F., Neghab, M., Shouroki, F. K., Yousefinejad, S., & Hassanzadeh, J. (2018). Early, subclinical hematological changes associated with occupational exposure to high levels of nitrous oxide. *Toxics*, 6(4), 4–13. <https://doi.org/10.3390/toxics6040070>
- Ansalone, C. M., Sarcletti, G., Crespi, V., Cavallo, D. M., Borchini, R., & Ferreraio, M. (2004). *Messa a punto di un metodo di misura del sevoflurano urinario per il monitoraggio biologico della esposizione a basse concentrazioni*.
- Barberio, C. J. C., Bolt, C. J. D., Austin, P. N., & Craig, M. W. J. (2006). Pollution of ambient air by volatile anesthetics: A comparison of 4 anesthetic management techniques. In *AANA Journal* (Vol. 74, Issue 2). [www.aana.com/members/journal/](http://www.aana.com/members/journal/)
- Barbic, F., Bagnati, M., Basile, M., Zanolì, M. V., Carettoni, L., Cassani, C., Porta, P., Fortina, A., Mantovani, C., & Bellomo, G. (2003). *L'esasfluoroisopropanolo urinario nella valutazione dell'esposizione professionale a sevofluorano: Aspetti metodologici e punti critici*.
- Blokke-Veldhuis, M. J., Rutten, P. M. M. J., & De Hert, S. G. (2011). Occupational exposure to sevoflurane during cardiopulmonary bypass. *Perfusion*, 26(5), 383–389. <https://doi.org/10.1177/0267659111409971>
- Braz, M. G., Carvalho, L. I. M., Chen, C. Y. O., Blumberg, J. B., Souza, K. M., Arruda, N. M., Filho, D. A. A., Resende, L. O., Faria, R. T. B. G., Canário, C. d. A., de Carvalho, L. R., Corrêa, C. R., Braz, J. R. C., & Braz, L. G. (2020). High concentrations of waste anesthetic gases induce genetic damage and inflammation in physicians exposed for three years: A cross-sectional study. *Indoor Air*, 30(3), 512–520. <https://doi.org/10.1111/ina.12643>
- Buratti, M., Pellegrino, O., Valla, C., & Colombi, A. (1993). *Monitoraggio biologico dell'esposizione professionale a gas e vapori anestetici: determinazione di protossido d'azoto, alotano e isoflurano dell'urina*.
- Byhahn, C., Heller, K., Lischke, V., & Westphal, K. (2001). Surgeon's Occupational Exposure to Nitrous Oxide and Sevoflurane during Pediatric Surgery. *World J. Surg*, 25, 1109–1112. <https://doi.org/10.1007/s00268-001-0089-1>
- Byhahn, C., Wilke, H.-J., Strouhal, U., Kessler, P., & Westphal, K. (2000). *Occupational exposure to nitrous oxide and desflurane during ear-nose-throat-surgery*.
- Cakmak, G., Eraydin, D., Berkkan, A., Yagar, S., & Burgaz, S. (2019). *Genetic damage of operating and recovery room personnel occupationally exposed to waste anaesthetic gases*. <https://doi.org/10.1177/0960327118783532>
- Chaoul, M. M., Braz, J. R. C., Lucio, L. M. C., Golim, M. A., Braz, L. G., & Braz, M. G. (2015). Does occupational exposure to anesthetic gases lead to increase of pro-inflammatory cytokines?



*Inflammation Research*, 64(12), 939–942. <https://doi.org/10.1007/s00011-015-0881-2>

- Cheng, N.-Y. Y., Chuang, H.-C. C., Shie, R.-H. H., Liao, W.-H. H., & Hwang, Y.-H. H. (2019). Pilot Studies of VOC Exposure Profiles during Surgical Operations. *Annals of Work Exposures and Health*, 63(2), 173–183. <https://doi.org/10.1093/annweh/wxy099>
- Cheung, S. K., Özelsel, T., Rashid, S., & Tsui, B. C. (2016). Postoperative environmental anesthetic vapour concentrations following removal of the airway device in the operating room versus the postanesthesia care unit. *Canadian Journal of Anesthesia*, 63(9), 1016–1021. <https://doi.org/10.1007/s12630-016-0678-y>
- Coleman, M. A., Coles, S., Lytle, T., & Bennetts, F. E. (1994). *Prevention of atmospheric contamination during isoflurane sedation*.
- Cope, K. A., Merritt, W. T., Krenzischek, D. A., Schaefer, J., Bukowski, J., Foster, W. M., Bernacki, E., Dorman, T., & Risby, T. H. (2002). Phase II collaborative pilot study: Preliminary analysis of central neural effects from exposure to volatile anesthetics in the PACU. *Journal of Perianesthesia Nursing*, 17(4), 240–250. <https://doi.org/10.1053/jpan.2002.34167>
- Dang, B., Esrryn-Behar, M., Maillard, M. F., Bourdon, R., & Saint-Maurice, C. (1992). *Theatre staff members and exposure to halogenated agents*. 279–284.
- De-Amici, D., Ceriana, P., Lodola, L., Rolandi, L., & Zecca, E. (1996). *Caratteristiche qualitative dell'esposizione umana a contaminanti chimici aerodispersi in sale operatorie*.
- Dehghani, F., Kamalinia, M., Omid, F., & Fallahzadeh, R. A. (2021). Probabilistic health risk assessment of occupational exposure to isoflurane and sevoflurane in the operating room. *Ecotoxicology and Environmental Safety*, 207(September 2020), 111270. <https://doi.org/10.1016/j.ecoenv.2020.111270>
- Domenegati, E., Rolandi, L., Lodola, L., Bressan, M. A., Ceriana, P., & Filisetti, P. (1996). *Valutazione di un protocollo di sorveglianza sanitaria per il personale esposto ad anestetici inalatori in tre sale operatorie campione* (pp. 267–305).
- Eroglu, A., Celep, F., & Erciyes, N. (2006). A comparison of sister chromatid exchanges in lymphocytes of anesthesiologists to nonanesthesiologist in the same hospital. *Anesthesia and Analgesia*, 102(5), 1573–1577. <https://doi.org/10.1213/01.ane.0000204298.42159.0e>
- Gentili, A., Accorsi, A., Pigna, A., Bachiocco, V., Domenichini, I., Baroncini, S., & Violante, F. S. (2004). *Exposure of personnel to sevoflurane during paediatric anaesthesia: influence of professional role and anesthetic procedure* (pp. 638–645).
- Ghimenti, S., Tabucchi, S., Bellagambi, F. G., Lomonaco, T., Onor, M., Trivella, M. G., Fuoco, R., & Di Francesco, F. (2015). Determination of sevoflurane and isopropyl alcohol in exhaled breath by thermal desorption gas chromatography-mass spectrometry for exposure assessment of hospital staff. *Journal of Pharmaceutical and Biomedical Analysis*, 106, 218–223. <https://doi.org/10.1016/j.jpba.2014.11.052>
- Gianella, M., Hahnloser, D., Rey, J. M., & Sigrist, M. W. (2014). Quantitative chemical analysis of surgical smoke generated during laparoscopic surgery with a vessel-sealing device. *Surgical Innovation*, 21(2), 170–179. <https://doi.org/10.1177/1553350613492025>
- Gobbo Braz, L., Reinaldo, J., Braz, C., Aparecido, G., Cavalcante, S., Souza, K. M., Mendes De Carvalho Lucio, L., & Gobbo Braz, M. (2017). Comparison of waste anesthetic gases in operating rooms with or without an scavenging system in a Brazilian University Hospital. *Brazilian Journal of Anesthesiology (English Edition)*, 67(5), 516–520. <https://doi.org/10.1016/j.bjane.2017.04.008>
- González-Rodríguez, R., Muñoz Martínez, A., Galan Serrano, J., & Moral García, M. V. (2014). Health worker exposure risk during inhalation sedation with sevoflurane using the (AnaConDa®)

anaesthetic conserving device. *Revista Espanola de Anestesiologia y Reanimacion*, 61(3), 133–139. <https://doi.org/10.1016/j.redar.2013.11.011>

- Gustorff, B., Lorenzl, N., Aram, L., Krenn, C. G., Jobst, B. P., & Hoerauf, K. H. (2002). Environmental monitoring of sevoflurane and nitrous oxide using the cuffed oropharyngeal airway. *Anesthesia and Analgesia*, 94(5), 1244–1248. <https://doi.org/10.1097/00000539-200205000-00036>
- Hall, J. E., Henderson, K. A., Oldham, T. A., Pugh, S., & Harmer, M. (1997). Environmental monitoring during gaseous induction with sevoflurane. In *British Journal of Anaesthesia* (Vol. 79).
- Haufroid, V., Cardinal, S., Licot, C., Villalpando, M. L., Van Obbergh, L., Clippe, A., & Lison, D. (2000). Biological monitoring of exposure to sevoflurane in operating room personnel by the measurement of hexafluoroisopropanol and fluoride in urine. *Biomarkers*, 5(2), 141–151. <https://doi.org/10.1080/135475000230451>
- Heiderich, S., Thoben, C., Dennhardt, N., Koppert, W., Krauß, T., Sümpelmann, R., Zimmermann, S., & Klingler, W. (2018). Low anaesthetic waste gas concentrations in postanesthesia care unit. *European Journal of Anaesthesiology*, 35(7), 534–538. <https://doi.org/10.1097/EJA.0000000000000785>
- Heijbel, H., Bjurstöm, R., & Jakobsson, J. G. (2010). Personnel breathing zone sevoflurane concentration adherence to occupational exposure limits in conjunction with filling of vaporisers. *Acta Anaesthesiologica Scandinavica*, 54(9), 1117–1120. <https://doi.org/10.1111/j.1399-6576.2010.02280.x>
- Henderson, K. A., & Matthews, I. P. (1999). An environmental survey of compliance with occupational exposure standards (OES) for anaesthetic gases. *Anaesthesia*, 54(10), 941–947. <https://doi.org/10.1046/j.1365-2044.1999.01032.x>
- Henderson, K. A., & Matthews, I. P. (2000). Staff exposure to anaesthetic gases in theatre and non theatre areas. *European Journal of Anaesthesiology*, 17(3), 149–151. <https://doi.org/10.1046/j.1365-2346.2000.00620.x>
- Herzog-Niescery, J., Botteck, N. M., Vogelsang, H., Gude, P., Bartz, H., Weber, T. P., & Seipp, H. M. (2015). Occupational chronic sevoflurane exposure in the everyday reality of the anesthesia workplace. *Anesthesia and Analgesia*, 121(6), 1519–1528. <https://doi.org/10.1213/ANE.0000000000001015>
- Herzog-Niescery, J., Gude, P., Gahlen, F., Seipp, H.-M., Bartz, H., Botteck, N. M., Bellgardt, M., Dazert, S., Weber, T. P., & Vogelsang, H. (2016). Surgeons' exposure to sevoflurane during paediatric adenoidectomy: a comparison of three airway devices. *Anaesthesia*, 71(8), 915–920. <https://doi.org/10.1111/anae.13515>
- Herzog-Niescery, J., Seipp, H.-M., Bellgardt, M., Herzog, T., Belyaev, O., Waldemar, U., Gude, P., Weber, T., & Vogelsang, H. (2020). *Comparison of 3 Methods to Assess Occupational Sevoflurane Exposure in Abdominal Surgeons: A Single-Center Observational Pilot Study*.
- Herzog-Niescery, J., Vogelsang, H., Bellgardt, M., Botteck, N. M., Seipp, H.-M. M., Bartz, H., Weber, T. P., & Gude, P. (2017). The child's behavior during inhalational induction and its impact on the anesthesiologist's sevoflurane exposure. *Paediatric Anaesthesia*, 27(12), 1247–1252. <https://doi.org/10.1111/pan.13269>
- Herzog-Niescery, J., Vogelsang, H., Bellgardt, M., Seipp, H.-M., Weber, T. P., & Gude, P. (2019). The Personnel's Sevoflurane Exposure in the Postanesthesia Care Unit Measured by Photoacoustic Gas Monitoring and Hexafluoroisopropanol Biomonitoring. *Journal of Perianesthesia Nursing*, 34(3), 606–613. <https://doi.org/10.1016/j.jopan.2018.10.005>
- Herzog-Niescery, J., Vogelsang, H., Gude, P., Seipp, H. M., Bartz, H., Uhl, W., Weber, T. P., & Bellgardt, M. (2018). The impact of the anesthetic conserving device on occupational exposure to isoflurane among intensive care healthcare professionals. *Minerva Anestesiologica*, 84(1), 25–32.

<https://doi.org/10.23736/S0375-9393.17.11770-0>

- Herzog-Niescery, J., Vogelsang, H., Gude, P., Seipp, H. M., Uhl, W., Weber, T. P., & Bellgardt, M. (2019). Environmental safety: Air pollution while using MIRUS™ for short-term sedation in the ICU. *Acta Anaesthesiologica Scandinavica*, 63(1), 86–92. <https://doi.org/10.1111/aas.13222>
- Hiller, K. N., Altamirano, A. V., Cai, C., Tran, S. F., & Williams, G. W. (2015). *Evaluation of Waste Anesthetic Gas in the Postanesthesia Care Unit within the Patient Breathing Zone*. <https://doi.org/10.1155/2015/354184>
- Hobbhahn, J., Hoerauf, K., Wiesner, G., Schrögenderfer, K., & Taeger, K. (1998). Waste gas exposure during desflurane and isoflurane anaesthesia. *Acta Anaesthesiologica Scandinavica*, 42(7), 864–867. <https://doi.org/10.1111/j.1399-6576.1998.tb05335.x>
- Hoerauf, K. H., Funk, W., Harth, M., & Hobbhahn, J. (1997). Occupational exposure to sevoflurane, halothane and nitrous oxide during paediatric anaesthesia. Waste gas exposure during paediatric anaesthesia. *Anaesthesia*, 52(3), 215–219. <https://doi.org/10.1111/j.1365-2044.1997.070-az0061.x>
- Hoerauf, K. H., Harth, M., Wild, K., & Hobbhahn, J. (1997). Occupational exposure to desflurane and isoflurane during cardiopulmonary bypass: is the gas outlet of the membrane oxygenator an operating theatre pollution hazard? In *British Journal of Anaesthesia* (Vol. 78).
- Hoerauf, K. H., Hartmann, T., Acilovic, S., Kopp, A., Wiesner, G., Gustorff, B., Jellinek, H., & Krafft, P. (2001). Waste gas exposure to sevoflurane and nitrous oxide during anaesthesia using the oesophageal-tracheal combitube small adult™. In *British Journal of Anaesthesia* (Vol. 86, Issue 1, pp. 124–126). <https://doi.org/10.1093/bja/86.1.124>
- Hoerauf, K. H., Hartmann, T., Zavrski, A., Adel, S., Rg Burger, H.-J., Koinig, H., & Zimpfer, M. (1999). *Occupational exposure to sevoflurane during sedation of adult patients*.
- Hoerauf, K. H., Koller, C., Jakob, W., Taeger, K., Hobbhahn, J., Hoerauf, K. H., Koller, C., Jakob, W., Taeger, K., & Hobbhahn, J. (1996). Isoflurane waste gas exposure during general anaesthesia: the laryngeal mask compared with tracheal intubation The treatment assignments (tracheal tube or LMA) were contained in sequen. In *British Journal of Anaesthesia* (Vol. 77).
- Hoerauf, K. H., Koller, C., Taeger, K., & Hobbhahn, J. (1996). Occupational exposure to sevoflurane and nitrous oxide in operating room personnel. *International Archives of Occupational and Environmental Health*, 69(2), 134–138. <https://doi.org/10.1007/s004200050127>
- Hoerauf, K. H., Wallner, T., Akça, O., Taslimi, R., & Sessler, D. I. (1999). Exposure to sevoflurane and nitrous oxide during four different methods of anesthetic induction. *Anesthesia and Analgesia*, 88(4), 925–929. <https://doi.org/10.1097/00000539-199904000-00045>
- Hua, H. X., Deng, H. B., Huang, X. L., Ma, C. Q., Xu, P., Cai, Y. H., & Wang, H. T. (2021). Effects of Occupational Exposure to Waste Anesthetic Gas on Oxidative Stress and DNA Damage. *Oxidative Medicine and Cellular Longevity*, 2021. <https://doi.org/10.1155/2021/8831535>
- IFA. (2015). *GESTIS International Limit Values GESTIS International Limit Values*. 2–3.
- Imberti, R., Preseglio, I., Imbriani, M., Ghittori, S., Cimino, F., & Mapelli, A. (1995). Low flow anaesthesia reduces occupational exposure to inhalation anaesthetics Environmental and biological measurements in operating room personnel. *Acta Anaesthesiologica Scandinavica*, 39(5), 586–591. <https://doi.org/10.1111/j.1399-6576.1995.tb04132.x>
- Imbriani, M., & Ghittori, S. (1988). Evaluation of exposure to isoflurane (Forane): Environmental and biological measurements in operating room personnel. *Journal of Toxicology and Environmental Health*, 25(4), 393–402. <https://doi.org/10.1080/15287398809531219>
- Imbriani, M., Ghittori, S., & Pezzagno, G. (1998). *The Biological Monitoring of Inhalation Anaesthetics*.

- Imbriani, M., Ghittori, S., Pezzagno, G., & Capodaglio, E. (1995). Anesthetic in urine as biological index of exposure in operating-room personnel. *Journal of Toxicology and Environmental Health*, 46(2), 249–260. <https://doi.org/10.1080/15287399509532032>
- Imbriani, M., Zadra, P., Negri, S., Alessio, A., Maestri, L., & Ghittori, S. (2001). *Monitoraggio biologico dell'esposizione professionale a sevoflurane*.
- Jafari, A., Bargeshadi, R., Jafari, · Fatemeh, Mohebbi, I., Hajaghazadeh, · Mohammad, Jafari, F., Mohebbi, I., & Hajaghazadeh, M. (2018). Environmental and biological measurements of isoflurane and sevoflurane in operating room personnel. *International Archives of Occupational and Environmental Health*, 91(3), 349–359. <https://doi.org/10.1007/s00420-017-1287-y>
- Jafari, A., Jafari, F., & Mohebbi, I. (2020). Effects of occupational exposure to trace levels of halogenated anesthetics on the liver, kidney, and oxidative stress parameters in operating room personnel. *Toxin Reviews*, 39(3), 242–251. <https://doi.org/10.1080/15569543.2018.1498898>
- Jan-Peter Özelsel, T., Kim, S., Buro, K., & Tsui, B. (2018). Paediatric Post-Anaesthesia Care Unit. *Turk J Anaesthesiol Reanim*, 46(5), 362–368. <https://doi.org/10.5152/TJAR.2018.35683>
- Jankowska, A., Czerczak, S., Kucharska, M., Wesolowski, W., Maciaszek, P., & Kupczewska-Dobacka, M. (2015). Application of predictive models for estimation of health care workers exposure to sevoflurane. *International Journal of Occupational Safety and Ergonomics*, 21(4), 471–479. <https://doi.org/10.1080/10803548.2015.1086183>
- Ji, Z., Wu, W., Zhou, F., Hu, J., Xu, Q., Yang, W., Peng, X., Wang, X., Zhang, C., & Li, L. (2021). Effects of sevoflurane exposure on apoptosis and cell cycle of peripheral blood lymphocytes, and immunologic function. *BMC Anesthesiology*, 21(1), 87. <https://doi.org/10.1186/s12871-021-01305-w>
- Kampan, S. (2019). Air quality and employee hygiene-related behavior in a post anesthesia care unit in Thailand. *Asian/Pacific Island Nursing Journal*, 4(1), 11–19. <https://doi.org/10.31372/20190401.1005>
- Kunze, N., Weigel, C., Vautz, W., Schwerdtfeger, K., Jünger, M., Quintel, M., & Perl, T. (2015). Multi-capillary column-ion mobility spectrometry (MCC-IMS) as a new method for the quantification of occupational exposure to sevoflurane in anaesthesia workplaces: an observational feasibility study. *Journal of Occupational Medicine and Toxicology*, 10(1), 1–9. <https://doi.org/10.1186/s12995-015-0056-7>
- Li, S.-H., Li, S.-N., Shih, H.-Y., Chiou, S.-F., & Yi, H.-D. (2004). A local scavenging system to remove waste anesthetic gases during general anesthesia. *Acta Anaesthesiologica Taiwanica : Official Journal of the Taiwan Society of Anesthesiologists*, 42(2), 61–67. <http://www.ncbi.nlm.nih.gov/pubmed/15346700>
- Li, S.-H., Li, S.-N., Shih, H.-Y., Yi, H.-D., & Chiang, C.-Y. (2002). *Personnel Exposure to Waste Sevoflurane and Nitrous Oxide during General Anesthesia with Cuffed Endotracheal Tube*.
- Lucchini, R., Belotti, L., Cassitto, M. G., Faillace, A., Margonari, M., Micheloni, G., Scapellato, M. L., Somenzi, V., Spada, T., Toffoletto, E., & Gilioli, R. (1997). *Neurobehavioral functions in operating theatre personnel: a multicenter study*.
- Lucchini, R., Toffoletto, F., Camerino, D., Fazioli, R., Ghittori, S., Gilioli, R., Signorini, A., & Alessio, L. (1995). Neurobehavioral functions in operating theatre personnel exposed to anesthetic gases. *Medicina Del Lavoro*, 86(1), 27–33.
- Marracini, P., Vittadini, G., Ghittori, S., Giorgi, I., Bonelli, S., Buonocore, M., & Imbriani, M. (1992). *Valutazione di alcuni parametri neuropsicologici in soggetti professionalmente esposti ad anestetici*.
- Mcglathlin, J. D., Moenning, J. E., & Cole, S. S. (2014). *Evaluation and Control of Waste Anesthetic Gases in the Postanesthesia Care Unit*. <https://doi.org/10.1016/j.jopan.2013.09.010>

- Mierdl, S., Byhahn, C., Abdel-Rahman, U., Matheis, G., & Westphal, K. (2003). Occupational exposure to inhalational anesthetics during cardiac surgery on cardiopulmonary bypass. *Annals of Thoracic Surgery*, 75(6), 1924–1927. [https://doi.org/10.1016/S0003-4975\(03\)00003-1](https://doi.org/10.1016/S0003-4975(03)00003-1)
- Neghab, M., Kargar-Shouroki, F., Mozdarani, H., Yousefinejad, S., Alipour, H., & Fardid, R. (2020). Association between genotoxic properties of inhalation anesthetics and oxidative stress biomarkers. In *Toxicology and Industrial Health* (Vol. 36, Issue 6, pp. 454–466). <https://doi.org/10.1177/0748233720935696>
- Norton, P., Pinho, P., Xará, D., Pina, F., & Norton, M. (2020). Assessment of anesthetic gases in a central hospital. *Porto Biomedical Journal*, 5(4), e076. <https://doi.org/10.1097/j.pbj.0000000000000076>
- Özelsel, T. J. P., Kim, S., Buro, K., & Tsui, B. (2018). Elevated waste anaesthetic gas concentration in the paediatric postanesthesia care unit. *Türk Anesteziyoloji ve Reanimasyon Dernegi Dergisi*, 46(5), 362–366. <https://doi.org/10.5152/TJAR.2018.35683>
- Pickworth, T., Jerath, A., Devine, R., Kherani, N., Marcin, R. •, & ,sowicz, W. (2013). *The scavenging of volatile anesthetic agents in the cardiovascular intensive care unit environment: a technical report La récupération des agents anesthésiques volatils dans l'environnement de l'unité des soins intensifs cardiovasculaires: un rapport tech.* <https://doi.org/10.1007/s12630-012-9814-5>
- Prado, C., Tortosa, J. A., Ibarra, I., Luna, A., & Periago, J. F. (1997). Biological monitoring of occupational exposure to isoflurane by measurement of isoflurane exhaled breath. In *Journal of Applied Toxicology* (Vol. 17, Issue 3, pp. 179–183). [https://doi.org/10.1002/\(SICI\)1099-1263\(199705\)17:3<179::AID-JAT425>3.0.CO;2-Y](https://doi.org/10.1002/(SICI)1099-1263(199705)17:3<179::AID-JAT425>3.0.CO;2-Y)
- Proietti, L., Duscio, D., Rotiroti, G., & Sandonà, P. B. (2000). *Monitoraggio ambientale e sorveglianza sanitaria per il personale esposto ad anestetici inalatori.*
- Proietti, L., Longo, B., Giulino, S., & DUScio, D. (2003). *Tecniche di somministrazione di agenti anestetici per inalazione, esposizione professionale ed effetti neurocomportamentali precoci.*
- Rahe-Meyer, N., Solomon, C., Vial, S., Gruber, M., Weilbach, C., Piepenbrock, S., & Winterhalter, M. (2009). Comparison of breathing tube connectors during invasive bronchial procedures. *Anaesthesia*, 64(6), 666–673. <https://doi.org/10.1111/j.1365-2044.2009.05894.x>
- Raj, N., Henderson, K. A., Hall, J. E., Aguilera, I. M., Harmer, M., Hutchings, A., & Williams, B. (2003). *Evaluation of personal, environmental and biological exposure of paediatric anaesthetists to nitrous oxide and sevoflurane\*.*
- Ravagli, A., Spalla, B., Marraccini, P., & Franco, G. (1987). Anesthetics vapors and gases and health hazards: results of an environmental survey. *Giornale Italiano Di Medicina Del Lavoro*, 9(1), 39–44.
- Rieder, J., Keller, C., Brimacombe, J., Gruber, G., Lirk, P., Summer, G., & Amann, A. (2002). *Monitoring pollution by proton-transfer-reaction mass spectrometry during paediatric anaesthesia with positive pressure ventilation via the laryngeal mask airway or uncuffed tracheal tube.*
- Rieder, J., Prazeller, P., Boehler, M., Lirk, P., Lindinger, W., & Amann, A. (2001). Online monitoring of air quality at the postanesthetic care unit by proton-transfer-reaction mass spectrometry. *Anesthesia and Analgesia*, 92(2), 389–392. <https://doi.org/10.1213/00000539-200102000-00021>
- Ritzu, S., Boccalon, P., Sanchez, M. A., Arcangeli, G., & Capelli, V. (2007). *ESPOSIZIONE A GAS ANESTETICI: RISULTATI DI 13 ANNI DI MONITORAGGIO AMBIENTALE E BIOLOGICO IN UN' AZIENDA OSPEDALIERA.*
- Rovesti, S., Ferrari, A., Faggiano, D., & Vivoli, G. (2005). *Monitoraggio dell'esposizione professionale ad anestetici volatili in sala operatoria: misurazioni ambientali e biologiche.*
- Sackey, P. V., Martling, C. R., Nise, G., & Radell, P. J. (2005). Ambient isoflurane pollution and isoflurane

consumption during intensive care unit sedation with the Anesthetic Conserving Device. *Critical Care Medicine*, 33(3), 585–590. <https://doi.org/10.1097/01.CCM.0000156294.92415.E2>

- Sárkány, P., Tankó, B., Simon, É., Gál, J., Fülesdi, B., & Molnár, C. (2016). Does standing or sitting position of the anesthesiologist in the operating theatre influence sevoflurane exposure during craniotomies? *BMC Anesthesiology*, 16(1), 1–5. <https://doi.org/10.1186/s12871-016-0284-0>
- Scapellato, M. L., Carrieri, M., Maccà, I., Salamon, F., Trevisan, A., Manno, M., & Bartolucci, G. B. (2014). Biomonitoring occupational sevoflurane exposure at low levels by urinary sevoflurane and hexafluoroisopropanol. *Toxicology Letters*, 231(2), 154–160. <https://doi.org/10.1016/j.toxlet.2014.10.018>
- Schebesta, K., Lorenz, V., Schebesta, E. M., HÖrauf, K., Gruber, M., Kimberger, O., Chiari, A., Frass, M., & Krafft, P. (2010). Exposure to anaesthetic trace gases during general anaesthesia: CobraPLA vs. LMA classic. *Acta Anaesthesiologica Scandinavica*, 54(7), 848–854. <https://doi.org/10.1111/j.1399-6576.2009.02194.x>
- Sessler, D. I., & Badgwell, J. M. (1998). Exposure of postoperative nurses to exhaled anesthetic gases. *Anesthesia and Analgesia*, 87(5), 1083–1088. <https://doi.org/10.1097/00000539-199811000-00019>
- Sitarek, K., Werolowski, W., Kucharska, M., & Celichowski, G. (2000). CONCENTRATIONS OF ANAESTHETIC GASES IN HOSPITAL OPERATING THEATRES.
- Souza, K. M., Braz, L. G., Nogueira, F. R., Souza, M. B., Bincoletto, L. F., Aun, A. G., Corrente, J. E., Carvalho, L. R., Braz, J. R. C., & Braz, M. G. (2016). Occupational exposure to anesthetics leads to genomic instability, cytotoxicity and proliferative changes. *Mutation Research/Fundamental and Molecular Mechanisms of Mutagenesis*, 791–792, 42–48. <https://doi.org/10.1016/j.mrfmmm.2016.09.002>
- Summer, G., Lirk, P., Hoerauf, K., Riccabona, U., Bodrogi, F., Raifer, H., Deibl, M., Rieder, J., & Schobersberger, W. (2003). Sevoflurane in exhaled air of operating room personnel. *Anesthesia and Analgesia*, 97(4), 1070–1073. <https://doi.org/10.1213/01.ANE.0000081796.67539.27>
- Tankó, B., Molnár, C., Budi, T., Peto, C., Novák, L., & Fülesdi, B. (2009). The relative exposure of the operating room staff to sevoflurane during intracerebral surgery. *Anesthesia and Analgesia*, 109(4), 1187–1192. <https://doi.org/10.1213/ane.0b013e3181b0cbea>
- Tanser, S. J., & Johnson, A. (2002). Evaluation of a new paediatric scavenging valve. *Paediatric Anaesthesia*, 12(5), 448–450. <https://doi.org/10.1046/j.1460-9592.2002.00835.x>
- Virgili, A., Scapellato, M. L., Maccà, I., Perini, M., Carrieri, M., Gori, G., Saia, B., & Bartolucci, G. B. (2002). *Esposizione professionale a gas anestetici in alcuni ospedali del Veneto* (pp. 447–450).
- Wiesner, G., Harth, M., Hoerauf, K., Szulc, R., Jurczyk, W., Sobczynski, P., Hobbhahn, J., & Taeger, K. (2000). Occupational exposure to inhaled anaesthetics: A follow-up study on anaesthetists of an eastern European university hospital. *International Archives of Occupational and Environmental Health*, 74(1), 16–20. <https://doi.org/10.1007/s004200000189>
- Wiesner, G., Harth, M., Szulc, R., Jurczyk, W., Sobczynski, P., Hoerauf, K. H., Hobbhahn, J., & Taeger, K. (2001). A follow-up study on occupational exposure to inhaled anaesthetics in Eastern European surgeons and circulating nurses. *International Archives of Occupational and Environmental Health*, 74(1), 16–20. <https://doi.org/10.1007/s004200000189>
- Williams, G. W., Gumbert, S. D., Pivalizza, E. G., Syed, T. A., Burnett, T., Mancillas, O. L., Vargas, L. A., Ahn, S. H., Cai, C., & Hagberg, C. A. (2019). *Evaluation and control of waste anesthetic gas in the postanesthesia care unit within patient and caregiver breathing zones*. <https://doi.org/10.1080/08998280.2018.1502017>

- Zaffina, S., Camisa, V., Poscia, A., Tucci, M. G., Montaldi, V., Cerabona, V., Wahocka, M., & Moscato, U. (2012). *Esposizione professionale al Sevoflurano nelle sale operatorie di pertinenza pediatrica: il contributo del monitoraggio ambientale con tecnica multi-punto nella valutazione del rischio*.
- Zanetti, C., Fiorio, S., Moretto, A., Foresto, F., Baggio, R., Gardin, F., & Scarpazza, F. (2004). *Studio longitudinale (16 anni) della salute riproduttiva di 61 lavoratrici esposte a livelli misurati di anestetici volatili*.
- Zare Sakhvidi, M. J., Barkhordari, A., Salehi, M., Behdad, S., & Fallahzadeh, H. (2013). Application of mathematical models in combination with monte carlo simulation for prediction of isoflurane concentration in an operation room theater. *Industrial Health*, 51(5), 545–551. <https://doi.org/10.2486/indhealth.2012-0130>
